# Supplementary material for: Facile synthesis of silicon quantum dots with photoluminescence in the near-ultraviolet to violet region via wet oxidation
Source: Royal Society of Chemistry journal article supplement (doi:10.1039/d4tc02095b), 2024-11-07
Supplement: d4tc02095b1.pdf [file d4tc02095b1.pdf]

**Facile synthesis of silicon quantum dots with photoluminescence in the near-ultraviolet to violet region *via* wet oxidation**

Yizhou He,<sup>a</sup> Qianxi Hao,<sup>a</sup> Chi Zhang,<sup>a</sup> Qi Wang,<sup>a</sup> Wenxin Zeng,<sup>a</sup> Jiamin Yu,<sup>b</sup> Xue Yang,<sup>\*b</sup> Shaorong Li,<sup>a</sup> Xiaowei Guo<sup>\*ac</sup> and Serguei K. Lazarouk<sup>d</sup>

<sup>a</sup>School of Optoelectronic Science and Engineering, University of Electronic Science and Technology of China, Chengdu 610054, China

<sup>b</sup>China National Tobacco Corporation Sichuan Company, Chengdu, 610041, China

<sup>c</sup>Yangtze Delta Region Institute (Huzhou), University of Electronic Science and Technology of China, Huzhou 313001, China

<sup>d</sup>Belarusian State University of Informatics and Radioelectronics, P. Browka 6, Minsk 220013, Belarus

\* Corresponding authors: 280055419@qq.com (X. Yang), gxw@uestc.edu.cn (X. Guo).

**Table S1.** Heating rates and durations for thermal pyrolysis.

|        |        |         |         |         |        |
|--------|--------|---------|---------|---------|--------|
| C1     | T1     | C2      | T2      | C3      | T3     |
| RT     | 60 min | 300 °C  | 30 min  | 600 °C  | 45 min |
| C4     | T4     | C5      | T5      | C6      | T6     |
| 600 °C | 40 min | 1000 °C | 360 min | 1000 °C | End    |

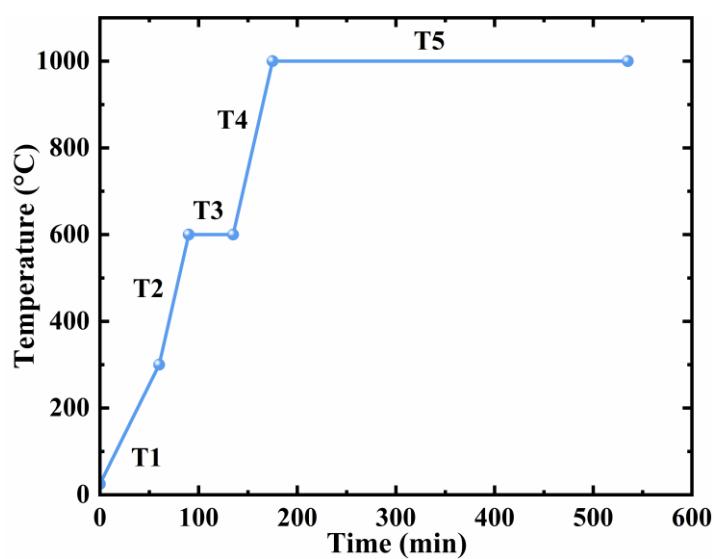

**Figure S1.** Procedure of thermal pyrolysis for HSQ polymers.

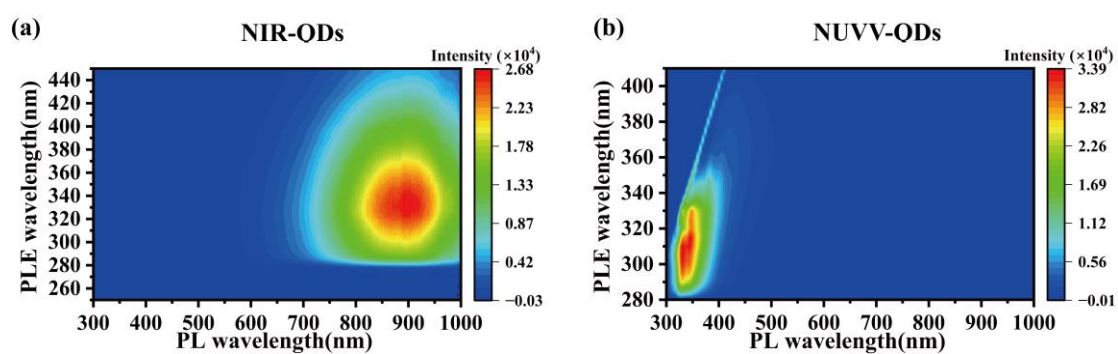

**Figure S2.** (a-b) 2D PL spectra of the NIR-QDs and the NUVV-QDs ( $\lambda_{em} = 300-1000$  nm).

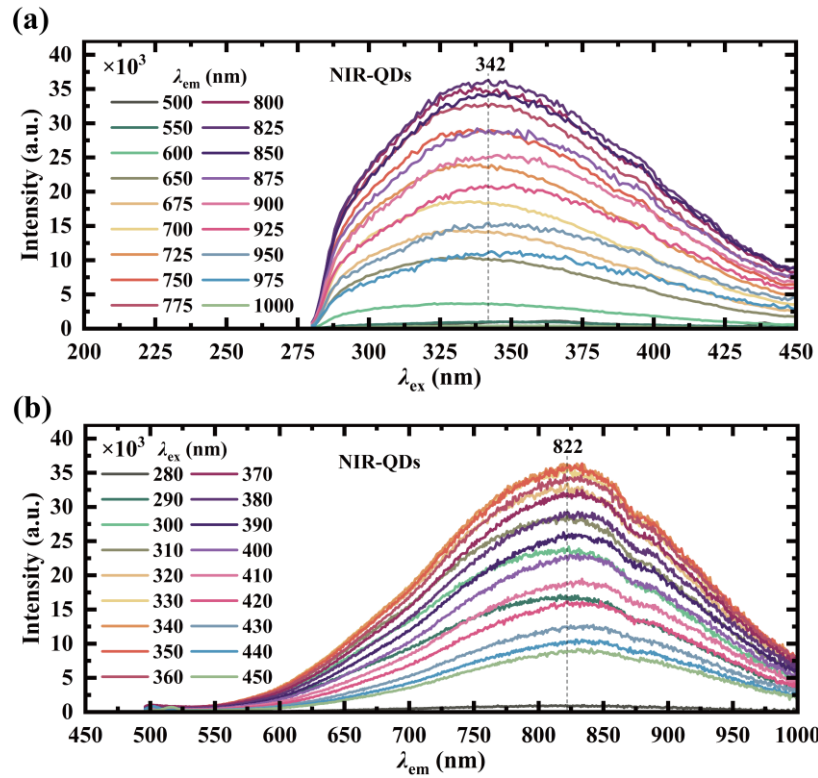

Figure S3. (a) PLE spectra of the NIR-QDs; (b) PL spectra of the NIR-QDs.

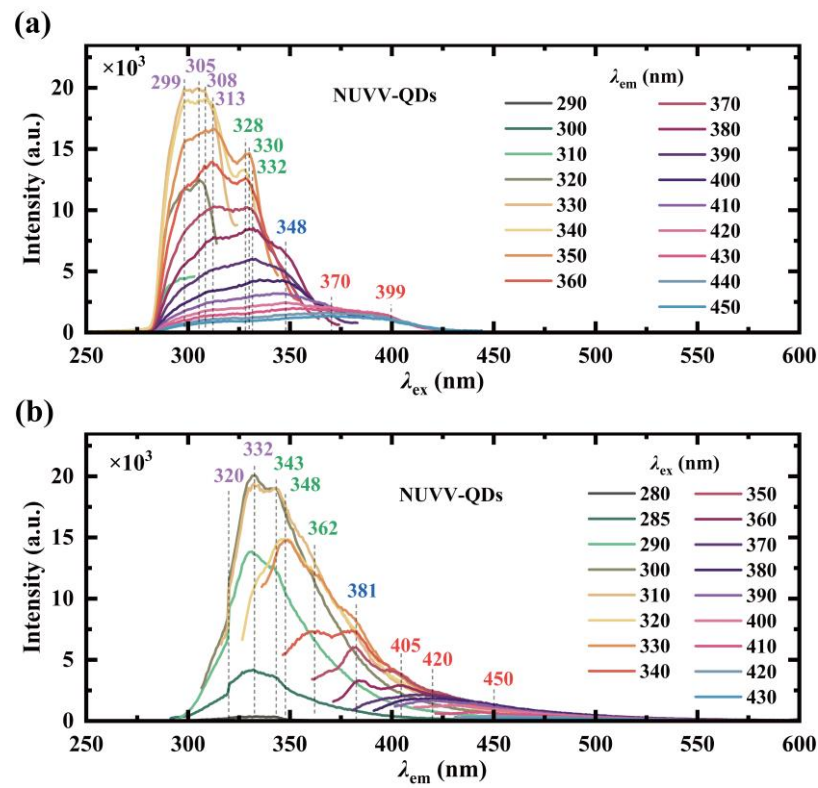

Figure S4. (a) PLE spectra of the NUVV-QDs; (b) PL spectra of the NUVV-QDs.

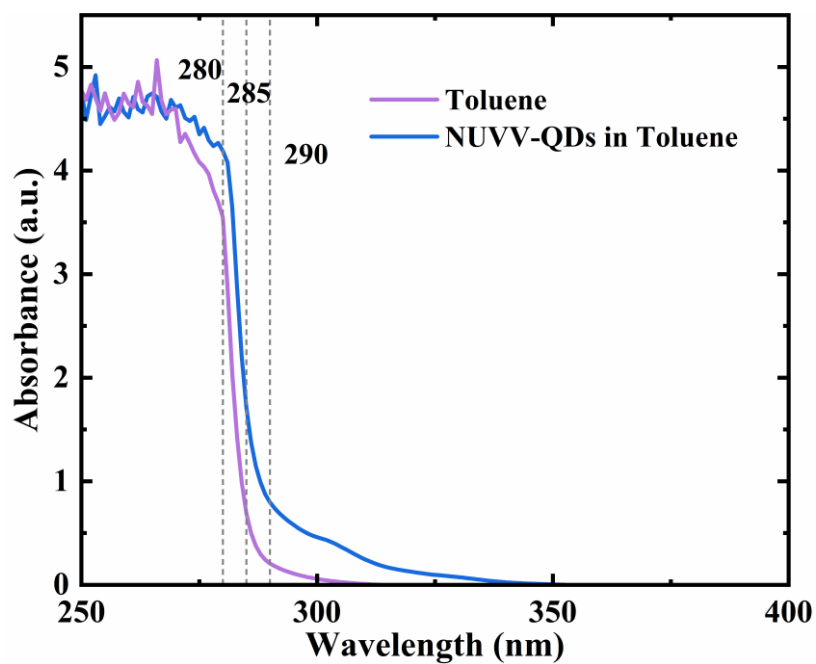

Figure S5. UV-Vis absorption spectra of toluene and NUVV-QDs solutions.

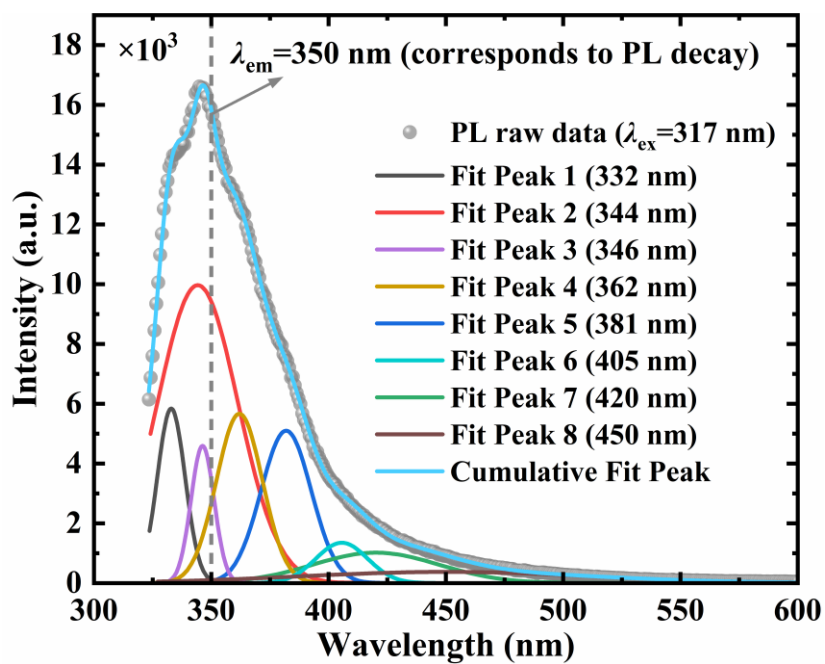

Figure S6. Eight Gaussian peaks of the decomposition of the PL spectrum ( $\lambda_{\text{ex}} = 317$  nm) for NUVV-QDs.

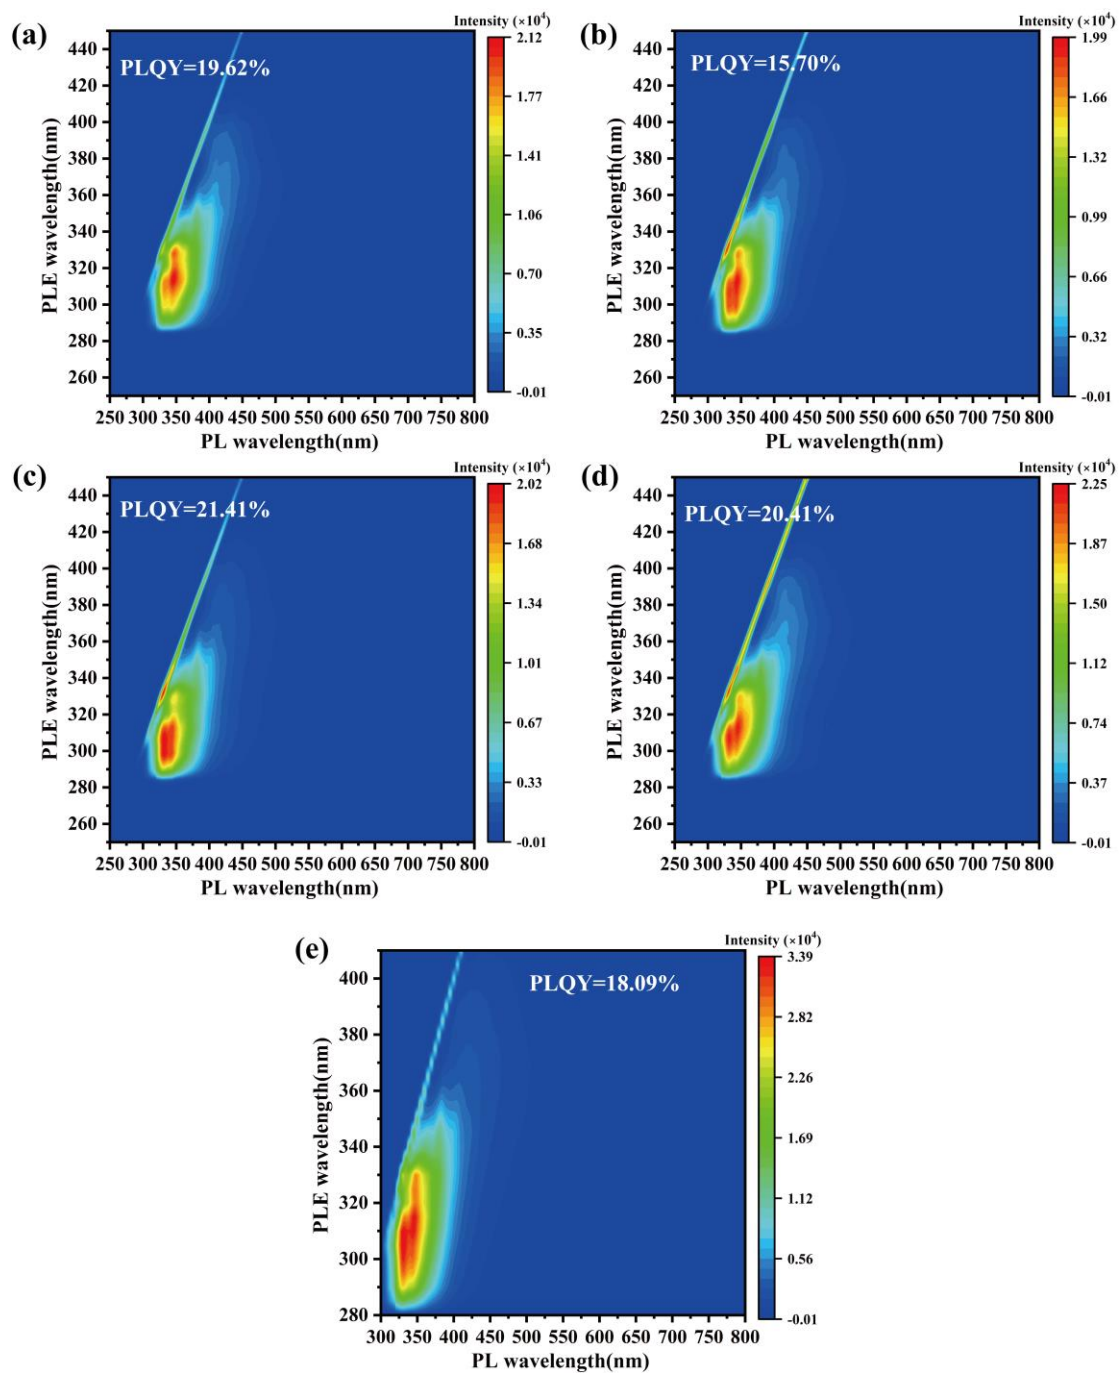

**Figure S7.** (a-e) 2D PL spectra and PLQYs of five independently prepared samples of the NUVV-QDs.

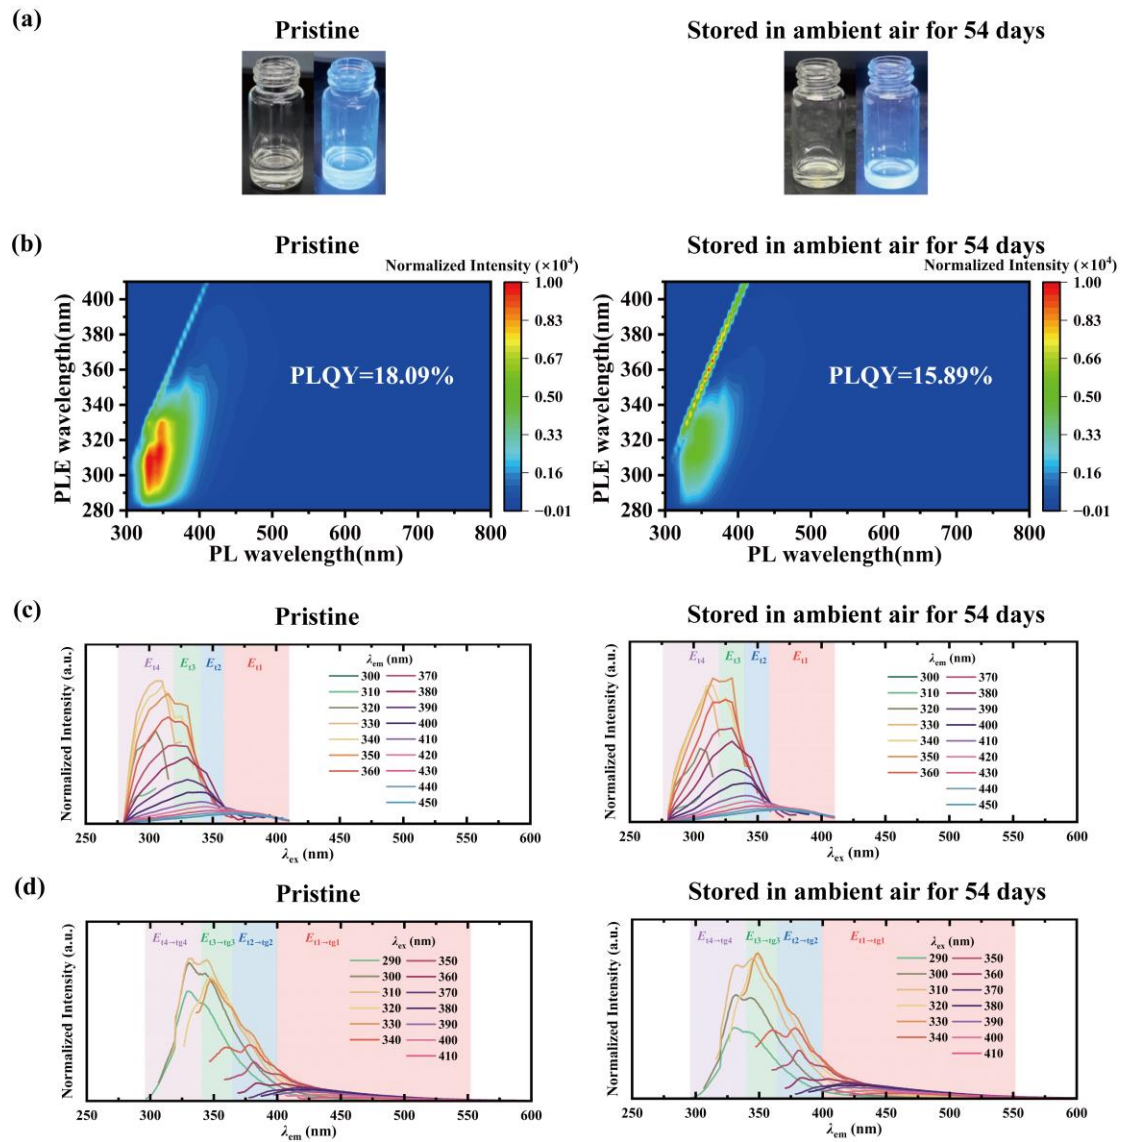

**Figure S8.** (a) Photographs of the NUVV-QDs before and after air-storage. (UV lamps emit at 365 nm); (b) 2D PL spectra of the NUVV-QDs before and after air-storage; (c) PLE spectra of the NUVV-QDs before and after air-storage; (d) PL spectra of the NUVV-QDs before and after air-storage.
